# Supplementary material for: Recent Advancements in Pathogenic Mechanisms, Applications and Strategies for Entomopathogenic Fungi in Mosquito Biocontrol
Source: MDPI journal article supplement (doi:10.3390/jof9070746), 2023-07-13
Supplement: s1 [file s1]

*Review*

# **Recent Advancements in Pathogenic Mechanisms, Applications and Strategies for Entomopathogenic Fungi in Mosquito Biocontrol**

**Yujie Qin <sup>1,2,3</sup>, Xiaoyu Liu <sup>1,2,3</sup>, Guoxiong Peng <sup>1,2,3</sup>, Yuxian Xia <sup>1,2,3</sup> and Yueqing Cao <sup>1,2,3,\*</sup>**

<sup>1</sup> School of Life Sciences, Chongqing University, Chongqing 401331, China

<sup>2</sup> Chongqing Engineering Research Center for Fungal Insecticides, Chongqing 401331, China

<sup>3</sup> Key Laboratory of Gene Function and Regulation Technologies under Chongqing Municipal Education Commission, 401331, Chongqing, China

\* Correspondence: yueqingcao@cqu.edu.cn

**Table S1** Recent research of fungal metabolites in mosquito control

| Fungi                                                                                                                                                      | Target                   | Species                                                                          | Extraction agent             | Effective ingredient                                                                                                                                                                                                                                                            | Reference |
|------------------------------------------------------------------------------------------------------------------------------------------------------------|--------------------------|----------------------------------------------------------------------------------|------------------------------|---------------------------------------------------------------------------------------------------------------------------------------------------------------------------------------------------------------------------------------------------------------------------------|-----------|
| <i>Aspergillus terreus</i>                                                                                                                                 | Larvae<br>Pupae          | <i>Anopheles stephensi</i> <i>Culex quinquefasciatus</i> <i>Aedes aegypti</i>    | Ethyl acetate<br>Methanol    | n-hexadecanoic acid; methyl 12,15-octadecadienoate; butyl 9-hexadecenoate; bis(hex-5-en-1-yloxy) (dimethyl)silane; 4-(2,3-imethoxybenzylidene)-3-methyl-1-(4-nitrophenyl)-2-pyrazolin-5-one; and 1,4 epoxynaphthalene-1(2H)-methanol, 4,5,7-tris(1,1-dimethylethyl)-3,4-dihydro | [49]      |
| <i>Metarhizium anisopliae</i>                                                                                                                              | Larvae<br>Pupae<br>Adult | <i>Anopheles stephensi</i> <i>Aedes aegypti</i><br><i>Culex quinquefasciatus</i> | Ethyl acetate                | camphor; caprolactam; and monobutyl phthalate                                                                                                                                                                                                                                   | [48]      |
| <i>Metarhizium anisopliae</i>                                                                                                                              | Larvae                   | <i>Aedes aegypti</i><br><i>Culex quinquefasciatus</i>                            | –                            | Cell free culture filtrates*                                                                                                                                                                                                                                                    | [124]     |
| <i>Penicillium toxicarium</i>                                                                                                                              | Larvae<br>Adults         | <i>Anopheles gambiae</i>                                                         | Ethyl acetate                |                                                                                                                                                                                                                                                                                 | [82]      |
| <i>Aspergillus lateralis</i> ;<br><i>Cladosporium</i> ; <i>Trichoderma</i><br><i>Diaporthe</i> ; <i>Albifimbria</i><br><i>Emmilia</i> ; <i>Sarocladium</i> | Larvae                   | <i>Aedes aegypti</i>                                                             | Ethyl acetate<br>isopropanol |                                                                                                                                                                                                                                                                                 | [125]     |

|                               |                             |                                                                                     |                    |                                                                                                                                                                                              |       |
|-------------------------------|-----------------------------|-------------------------------------------------------------------------------------|--------------------|----------------------------------------------------------------------------------------------------------------------------------------------------------------------------------------------|-------|
| <i>Aspergillus niger</i>      | FREP1 protein of Plasmodium | <i>Anopheles gambiae</i>                                                            |                    | <i>P-orlandin</i>                                                                                                                                                                            | [83]  |
| <i>Fusarium oxysporum</i>     | Larvae<br>Pupae             | <i>Anopheles stephensi</i><br><i>Aedes aegypti</i><br><i>Culex quinquefasciatus</i> | Ethyl acetate      | carbonic acid, bis (1-methylethyl) ester; 4-heptanol, 2-Methyl; and 1-4-benzopyram-4-one-5, 6, 7, 8-tetrahydro-3-hydroxy-2-methyl                                                            | [46]  |
| <i>Penicillium</i> spp.       | Larvae                      | <i>Aedes aegypti</i> L<br><i>Culex quinquefasciatus</i>                             | Ethyl acetate      |                                                                                                                                                                                              | [126] |
| <i>Trichoderma asperellum</i> | Larvae                      | <i>Anopheles</i>                                                                    | Methanolic extract | 2,3-di hydro thiopene; p-cymene; alpha pinene; hexadecanoic acid; 8-methyl quinoline; (Z, Z)-9,12-octa decadienoic acid, methyl ester; and 2,3-dihydro-3,5-dihydroxy-6-methyl-4H-Pyran-4-one | [71]  |
| <i>Aspergillus tamarii</i>    | Larvae                      | <i>Aedes aegypti</i><br><i>Culex quinquefasciatus</i>                               | Ethyl acetate      | preg-4-en-3-one, 17. $\alpha$ -hydroxy-17. $\beta$ -cyano-; Trans-3-Undecene-1,5-diyne; and pentane, 1,1,1,5-tetrachloro-                                                                    | [127] |
| <i>Penicillium daleae</i>     | Larvae                      | <i>Culex quinquefasciatus</i><br><i>Aedes aegypti</i>                               | Ethyl acetate      |                                                                                                                                                                                              | [128] |
| <i>Beauveria bassiana</i>     | Larvae                      | <i>Culex quinquefasciatus</i>                                                       | Ethyl acetate      | N-hexadecanoic acids; Z, Z-9,12 octadecadienic acid; 9-eicosyne; heptacosane; tetrateracontane; and 7 hexyleicosane                                                                          | [46]  |

---

|                                                                   |        |                                                 |               |                                                                                                                                                                                                                                                               |       |
|-------------------------------------------------------------------|--------|-------------------------------------------------|---------------|---------------------------------------------------------------------------------------------------------------------------------------------------------------------------------------------------------------------------------------------------------------|-------|
| <i>Penicillium</i> spp.                                           | Larvae | <i>Culex quinquefasciatus</i>                   | Ethyl acetate | Propanoic acid, ethyl ester; Acetic Acid, Propyl Ester; Isopentyl Acetate; Acetic Acid, 2-Methylpropyl Ester; Behenic alcohol; 1-Hexadecene; 1-Octadecene; 1-Hexacosanol; N-Hexadecanoic acid; 1-Tetradecanol; 1-Dodecene; Tetradamine; and Octadecanoic acid | [129] |
| <i>Trichoderma longibrachiatum</i> ;<br><i>Trichoderma viride</i> | Larvae | <i>Aedes aegypti</i><br><i>Aedes albopictus</i> | –             | Cell free culture filtrates*                                                                                                                                                                                                                                  | [84]  |
| <i>Aspergillus</i> spp.                                           | Larvae | <i>Aedes aegypti</i>                            | Ethyl acetate | Aspergillol B                                                                                                                                                                                                                                                 | [79]  |
| <i>Aspergillus flavus</i>                                         | Larvae | <i>Aedes aegypti</i>                            | -             | aflatoxins (B1, B2, G1 and G2)                                                                                                                                                                                                                                | [70]  |

---

\* Cell free culture filtrate: no extraction agent
